# Supplementary material for: Repeat-mediated deletions can be induced by a chromosomal break far from a repeat, but multiple pathways suppress such rearrangements
Source: PubMed Central journal article supplement — Genes Dev. 2018 Apr 1;32(7-8):524–36. doi: 10.1101/gad.311084.117 (PMC5959236; doi:10.1101/gad.311084.117), 2018-04-01
Supplement: supp_gad.311084.117_Supplemental_Fig_S2.pdf [file supp_gad.311084.117_Supplemental_Fig_S2.pdf]

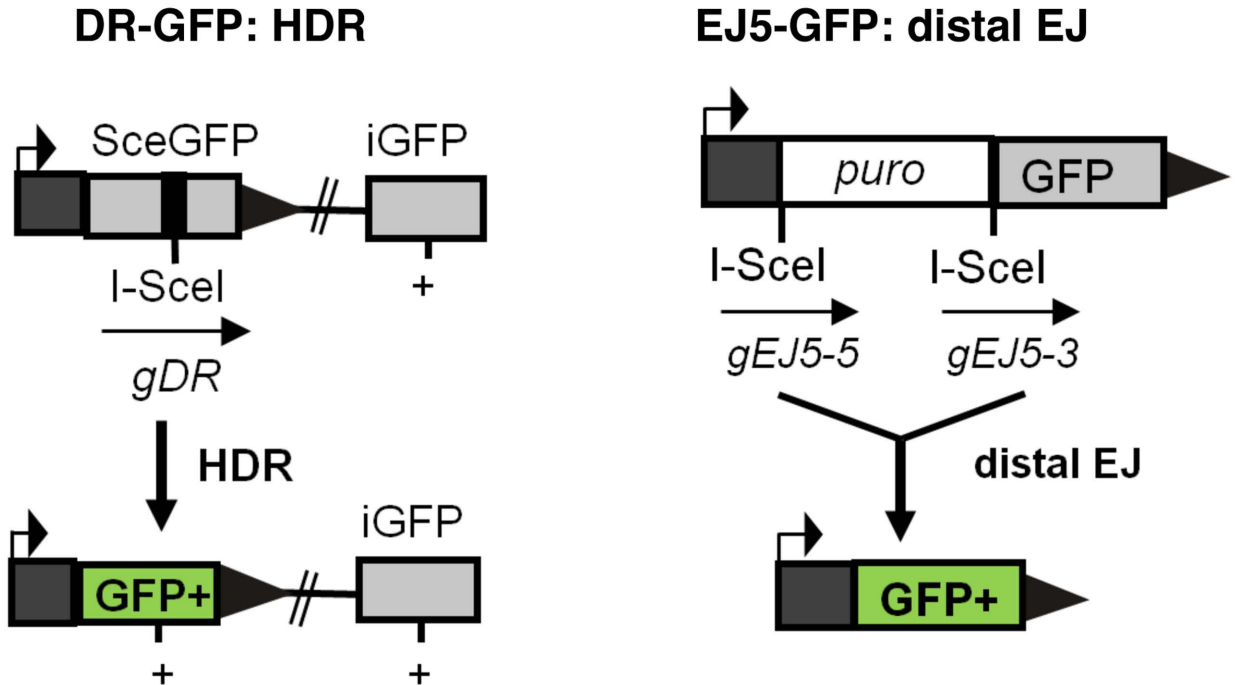

**Figure S2.** Shown are diagrams of the DR-GFP and EJ5-GFP reporter assays, including the approximate positions of the sgRNAs (gDR, and gEJ5-5 and gEJ5-3) used to induce Cas9-mediated DSBs in each respective reporter.
