# Supplementary material for: Repeat-mediated deletions can be induced by a chromosomal break far from a repeat, but multiple pathways suppress such rearrangements
Source: PubMed Central journal article supplement — Genes Dev. 2018 Apr 1;32(7-8):524–36. doi: 10.1101/gad.311084.117 (PMC5959236; doi:10.1101/gad.311084.117), 2018-04-01
Supplement: supp_gad.311084.117_Supplemental_Fig_S3.pdf [file supp_gad.311084.117_Supplemental_Fig_S3.pdf]

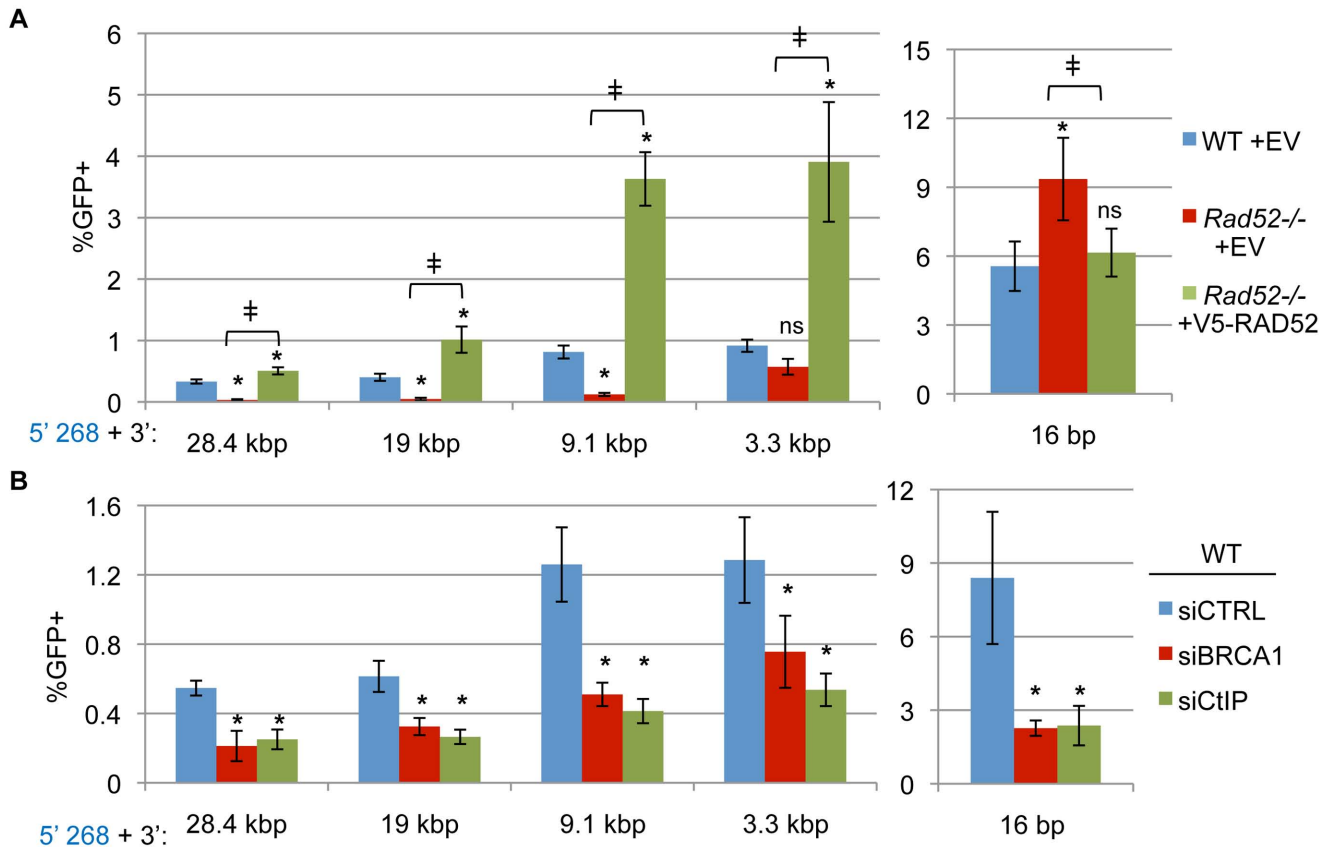

**Figure S3.** Data from Fig. 3 represented in bar graphs. Shown is RMD frequency data from (A) Fig. 3A, and (B) Fig. 3B represented as bar graphs.
