# Supplementary material for: Repeat-mediated deletions can be induced by a chromosomal break far from a repeat, but multiple pathways suppress such rearrangements
Source: PubMed Central journal article supplement — Genes Dev. 2018 Apr 1;32(7-8):524–36. doi: 10.1101/gad.311084.117 (PMC5959236; doi:10.1101/gad.311084.117), 2018-04-01
Supplement: supp_gad.311084.117_Supplemental_Fig_S4.pdf [file supp_gad.311084.117_Supplemental_Fig_S4.pdf]

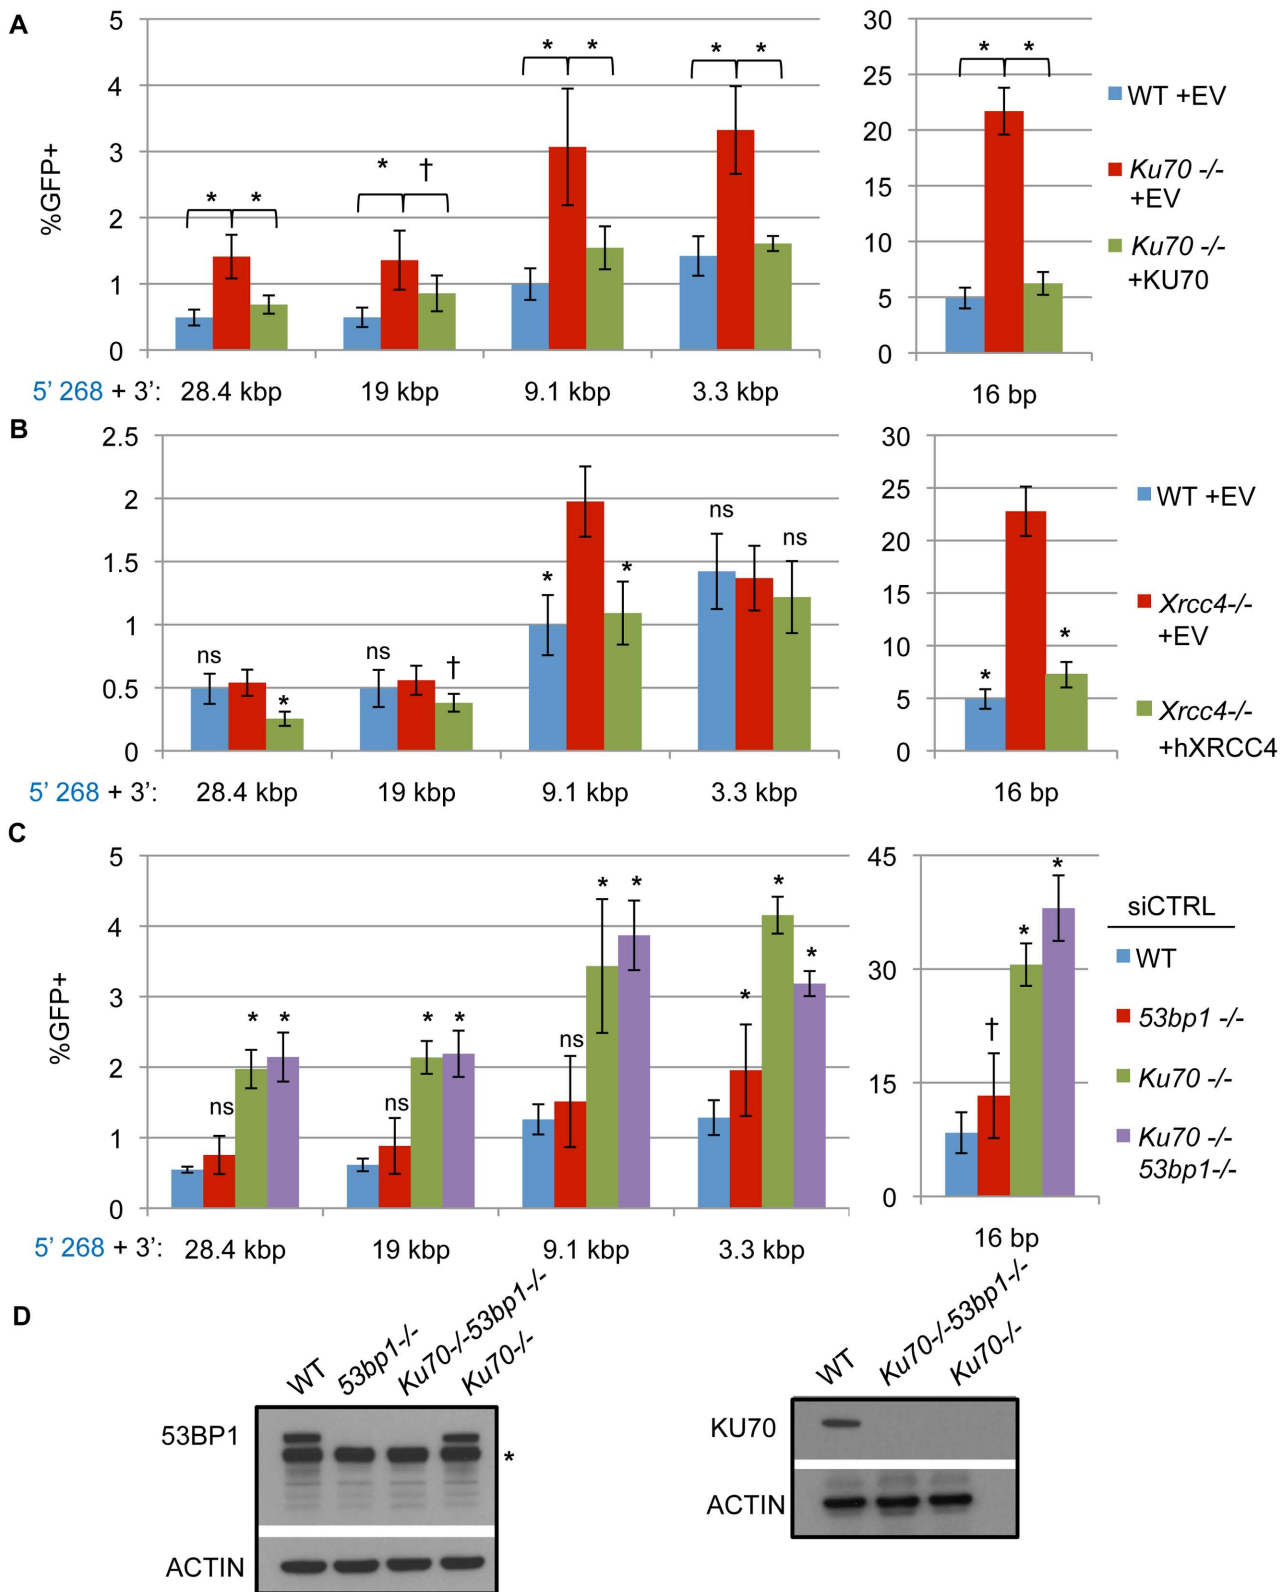

**Figure S4.** Data from Fig. 4 represented in bar graphs, and immunoblotting analysis of mESCs. Shown is RMD frequency data from **(A)** Fig. 4A, and **(B)** Fig. 4B, **(C)** Fig 4C represented as bar graphs. **(D)** Shown is immunoblotting analysis confirming loss of 53BP1 and/or KU70 in the respective cell lines. \*nonspecific band.
