# Supplementary material for: Repeat-mediated deletions can be induced by a chromosomal break far from a repeat, but multiple pathways suppress such rearrangements
Source: PubMed Central journal article supplement — Genes Dev. 2018 Apr 1;32(7-8):524–36. doi: 10.1101/gad.311084.117 (PMC5959236; doi:10.1101/gad.311084.117), 2018-04-01
Supplement: supp_gad.311084.117_Supplemental_Fig_S5.pdf [file supp_gad.311084.117_Supplemental_Fig_S5.pdf]

A

3' R Sequence:

```

RMD-GFP 1>CCTGGTGATGTCGGACCTGTTCCGCACAGGAGCAAAGTGTGCCGTTGTCTCTTCGGTCCCGTGGACAGTGAGCAGTTGCGCCGTGATTGCGATGCGCTCA>100
1% 1>CCTGGTGATGTCGGACCTGTTCCGCACAGGAGCAAAGTGTGCCGTTGTCTCTTCGGTCCCGTGGACAGTGAAGCAGTTGCGCCGTGATTGCGATGCGCTCA>100
3% 1>CCTGGTGATGTCGGACCTGTTCCGCACAGGAGCAAAGTGTGCCGTTGTCTCTTCGGTCCCGTGGACAGTGAAGTGAAGCAGTTGCGCCGTGATTGCGATGCGCTCA>100

101>TGGCGGGCTGTCTCCAGGAGGCCCGAGAACGGTGGAACTTTGACTTCGTACCGAGAGCGCCGCTGGAGGGCAACTTCGTCTGGGAGCGCGTTCCGGAGCCT>200
101>TGGCGGGCTGTCTCCAGGAGGCCCGAGAACGGTGGAACTTTGACTTCGTACCGAGAGCGCCGCTGGAGGGCAACTTCGTCTGGGAGCGCGTTCCGGAGCCT>200
101>TGGCGGGCTGTCTCCAGGAGGCCCGAGAACGGTGGAACTTTGACTTCGTACCGAGAGCGCCGCTGGAGGGCAACTTCGTCTGGGAGCGCGTTCCGGAGCCT>200

201>AGGGCTGCCCAAGGTCTACCTGAGCCCTGGGTCCCGCAGCCGTGACGACCTGGGAGGGGACAAGAGGCCCAGTACTTCCTCTGCCCT>287
201>AGGGCTGCCCAAGGTCTACCTGAGCCCTGGGTCCCGCAGCCGTGACGACCTGGGAGGGGACAAGAGGCCCAGTACTTCCTCTGCCCT>287
201>AGGGCTGCCCAAGGTCTACCTGAGCCCTGGGTCCCGCAGCCGTGACGACCTGGGAGGGGACAAGAGGCCCAGTACTTCCTCTGCCCT>287

```

B

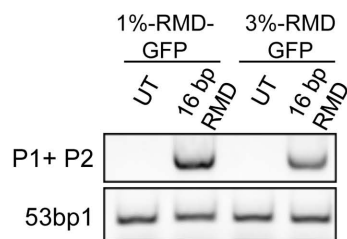

C

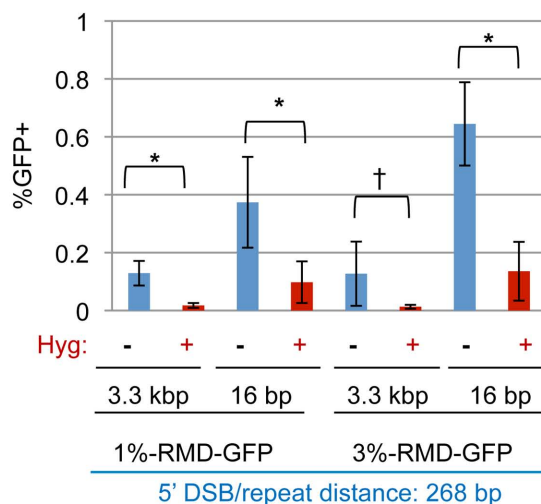

**Figure S5.** Validation of RMD-GFP reporters with divergent repeats. **(A)** Sequence of the 287 bp 3' repeat (R) in the RMD-GFP, 1%-RMD-GFP (1%), and 3%-RMD-GFP (3%) reporters. **(B)** Shown are PCR amplification products to confirm the *Cdkn1A*-GFP fusion gene in GFP+ cells from 1%-RMD-GFP and 3%-RMD-GFP WT mESCs, using the primers shown in Fig. 1A. **(C)** GFP+ cells from 1%-RMD-GFP and 3%-RMD-GFP WT mESCs are sensitive to *hyg* treatment. Shown is the frequency of GFP+ cells normalized to transfection efficiency for 1%-RMD-GFP and 3%-RMD-GFP WT cells cultured without (blue bars) or with (red bars) hygromycin, using the protocol shown in Fig. S1A. N= 9. Error bars represent s.d. \* $P \leq 0.0029$  and † $P = 0.0304$  for indicated comparisons using an Unpaired *t*-test with the Holm-Sidak correction.
