# Supplementary material for: Repeat-mediated deletions can be induced by a chromosomal break far from a repeat, but multiple pathways suppress such rearrangements
Source: PubMed Central journal article supplement — Genes Dev. 2018 Apr 1;32(7-8):524–36. doi: 10.1101/gad.311084.117 (PMC5959236; doi:10.1101/gad.311084.117), 2018-04-01
Supplement: supp_gad.311084.117_Supplemental_Fig_S6.pdf [file supp_gad.311084.117_Supplemental_Fig_S6.pdf]

A

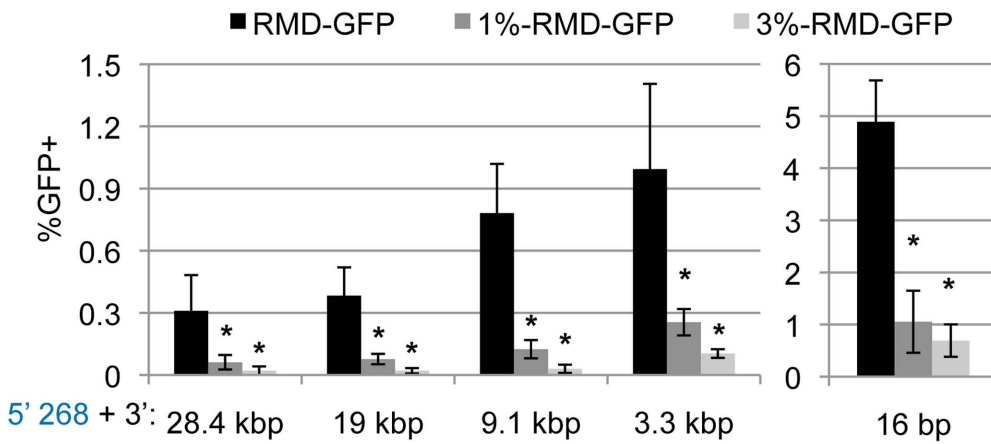

B

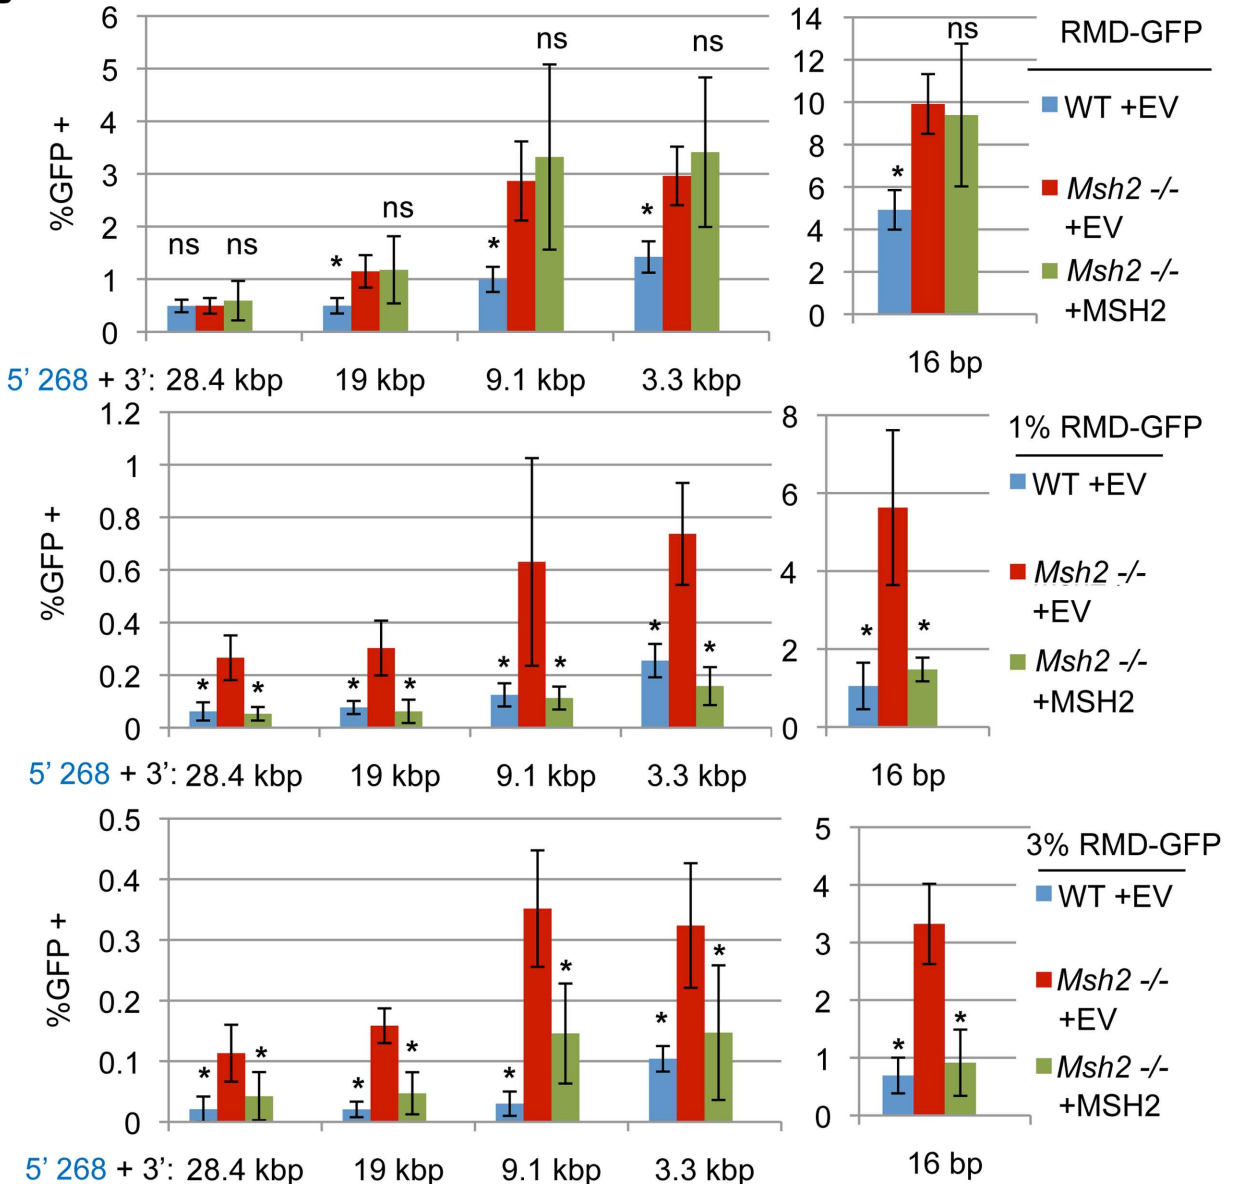

**Figure S6.** Data from Fig. 6 represented in bar graphs, along with examining the parental RMD-GFP reporter in *Msh2*<sup>-/-</sup> mESCs. Shown is RMD frequency data from (A) Fig. 6A, and (B) Fig. 6B, represented as bar graphs. Also shown is the analysis of the RMD-GFP parental reporter in *Msh2*<sup>-/-</sup> mESCs, which were transfected with the respective sgRNA/Cas9 expression vectors, along with a control EV, or MSH2 complementation vector. Shown are the %GFP+ frequencies normalized to transfection efficiency, along with the WT frequencies from Fig. 6A (N=15). N= 9 for *Msh2*<sup>-/-</sup> mESCs. Error bars indicate s.d. \**P*≤ 0.001 comparisons vs. *Msh2*<sup>-/-</sup> EV, using One-way ANOVA with Dunnett's Test.
