# Supplementary material for: Repeat-mediated deletions can be induced by a chromosomal break far from a repeat, but multiple pathways suppress such rearrangements
Source: PubMed Central journal article supplement — Genes Dev. 2018 Apr 1;32(7-8):524–36. doi: 10.1101/gad.311084.117 (PMC5959236; doi:10.1101/gad.311084.117), 2018-04-01
Supplement: supp_gad.311084.117_Supplemental_Fig_S7.pdf [file supp_gad.311084.117_Supplemental_Fig_S7.pdf]

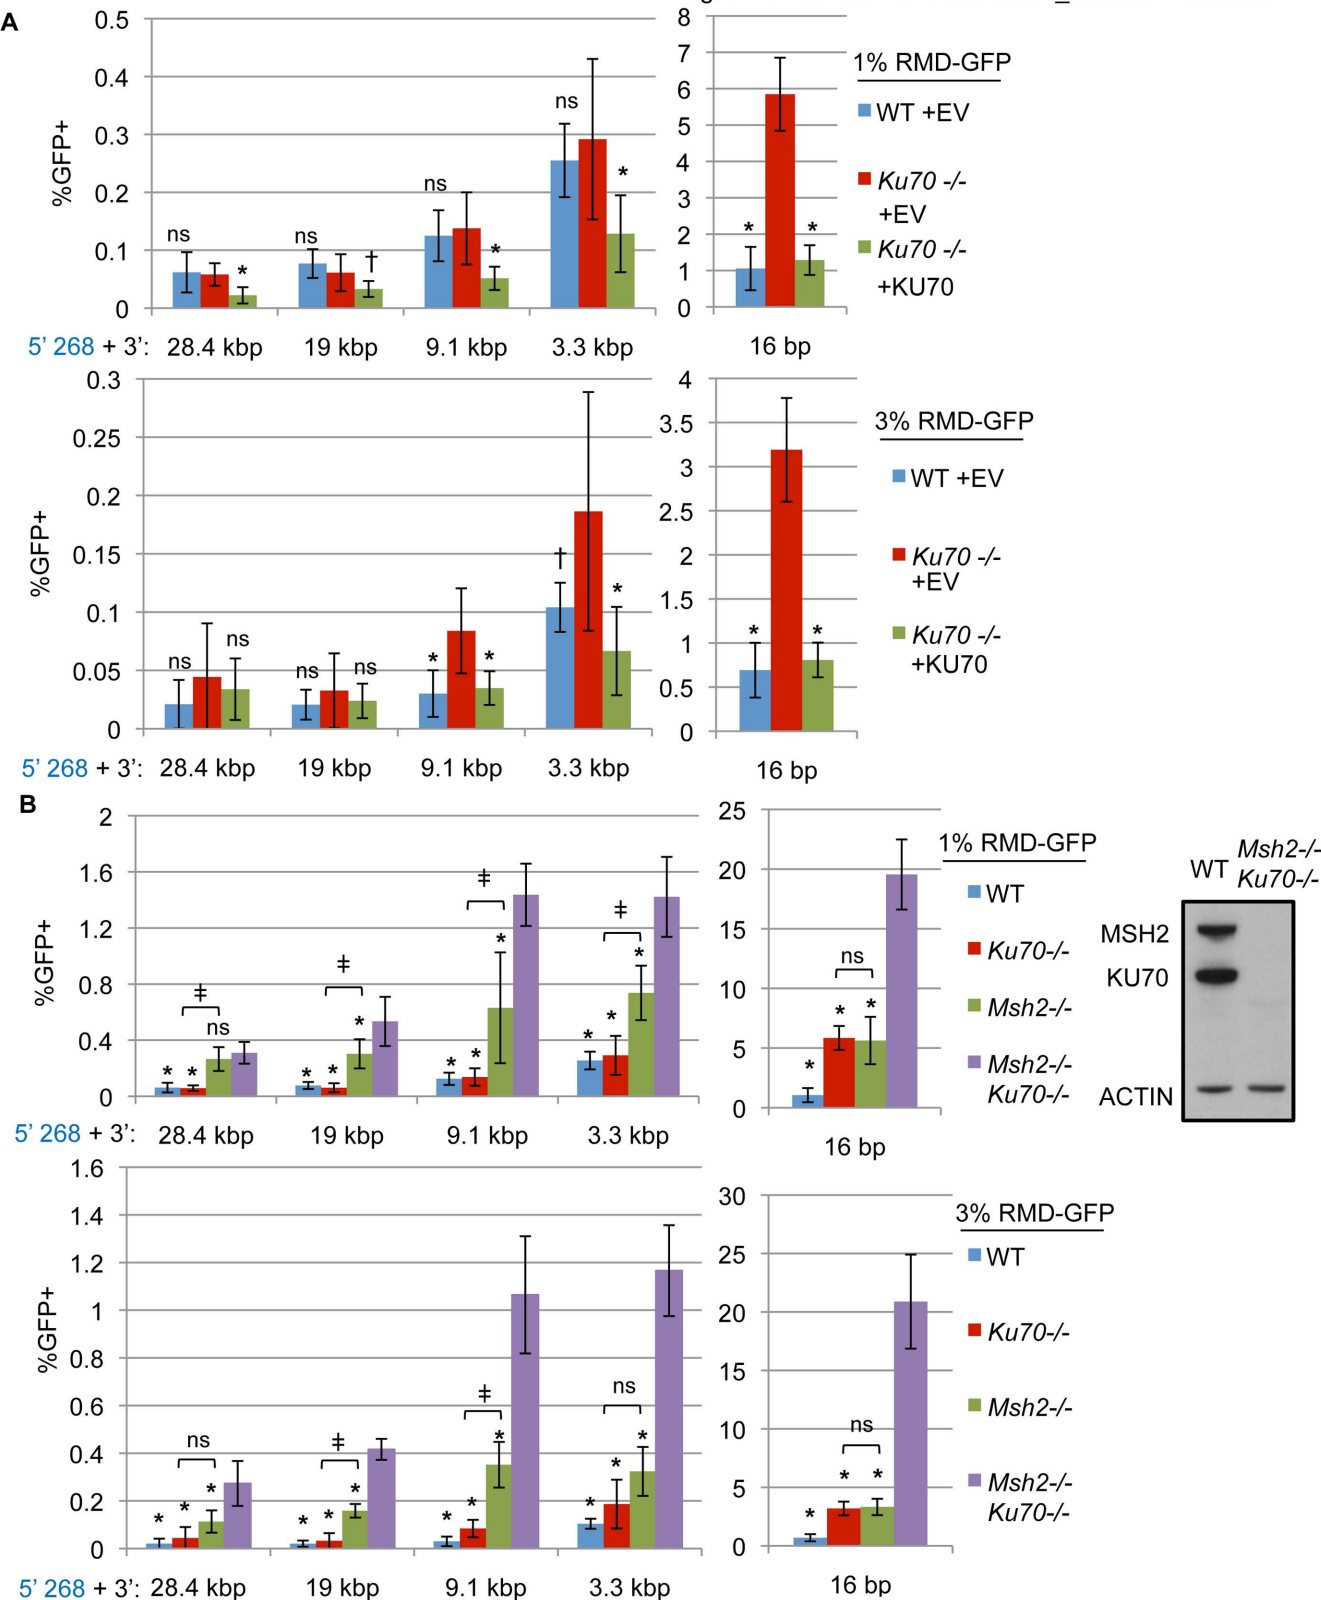

**Figure S7.** Shown is the data related to Fig. 7A and 7B. Shown is RMD frequency data from (A) Fig. 7A, and (B) Fig. 7B, represented as bar graphs. Also shown is immunoblotting analysis confirming loss of MSH2 and KU70 in the *Msh2*<sup>-/-</sup>*Ku70*<sup>-/-</sup> mESC line.
