# Supplementary material for: Repeat-mediated deletions can be induced by a chromosomal break far from a repeat, but multiple pathways suppress such rearrangements
Source: PubMed Central journal article supplement — Genes Dev. 2018 Apr 1;32(7-8):524–36. doi: 10.1101/gad.311084.117 (PMC5959236; doi:10.1101/gad.311084.117), 2018-04-01
Supplement: supp_gad.311084.117_Supplemental_Fig_S8.pdf [file supp_gad.311084.117_Supplemental_Fig_S8.pdf]

A

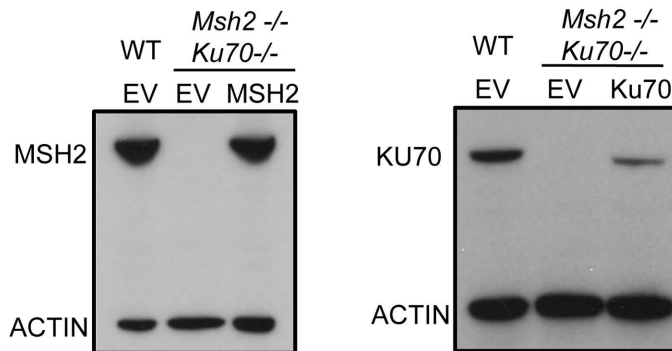

B

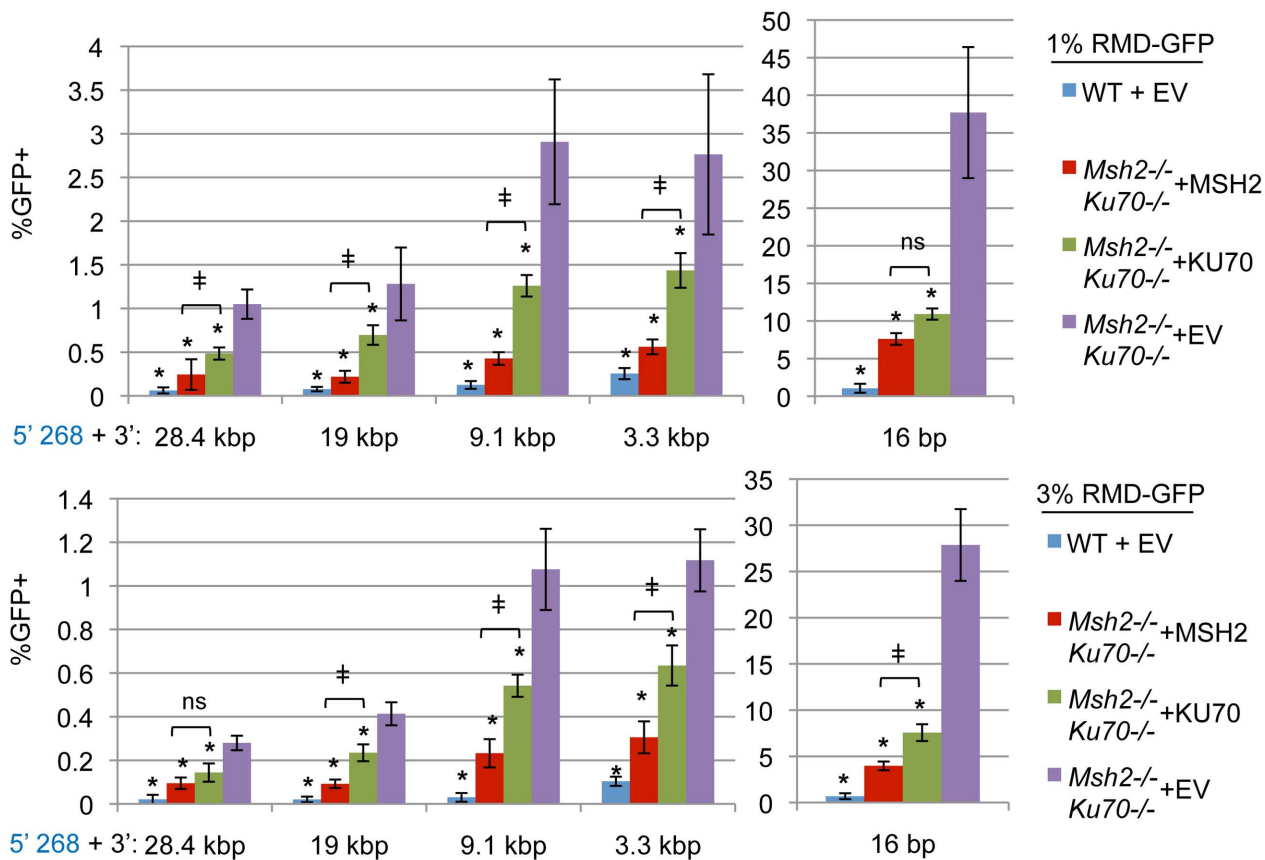

**Figure S8.** Shown is data related to Fig. 7C. **(A)** immunoblotting analysis confirming MSH2 and KU70 expression from the respective complementation vectors in the *Msh2*<sup>-/-</sup> *Ku70*<sup>-/-</sup> mESC line. **(B)** Data from Fig. 7C represented in bar graphs.
