# Supplementary material for: Repeat-mediated deletions can be induced by a chromosomal break far from a repeat, but multiple pathways suppress such rearrangements
Source: PubMed Central journal article supplement — Genes Dev. 2018 Apr 1;32(7-8):524–36. doi: 10.1101/gad.311084.117 (PMC5959236; doi:10.1101/gad.311084.117), 2018-04-01
Supplement: supp_gad.311084.117_Supplemental_Fig_S9.pdf [file supp_gad.311084.117_Supplemental_Fig_S9.pdf]

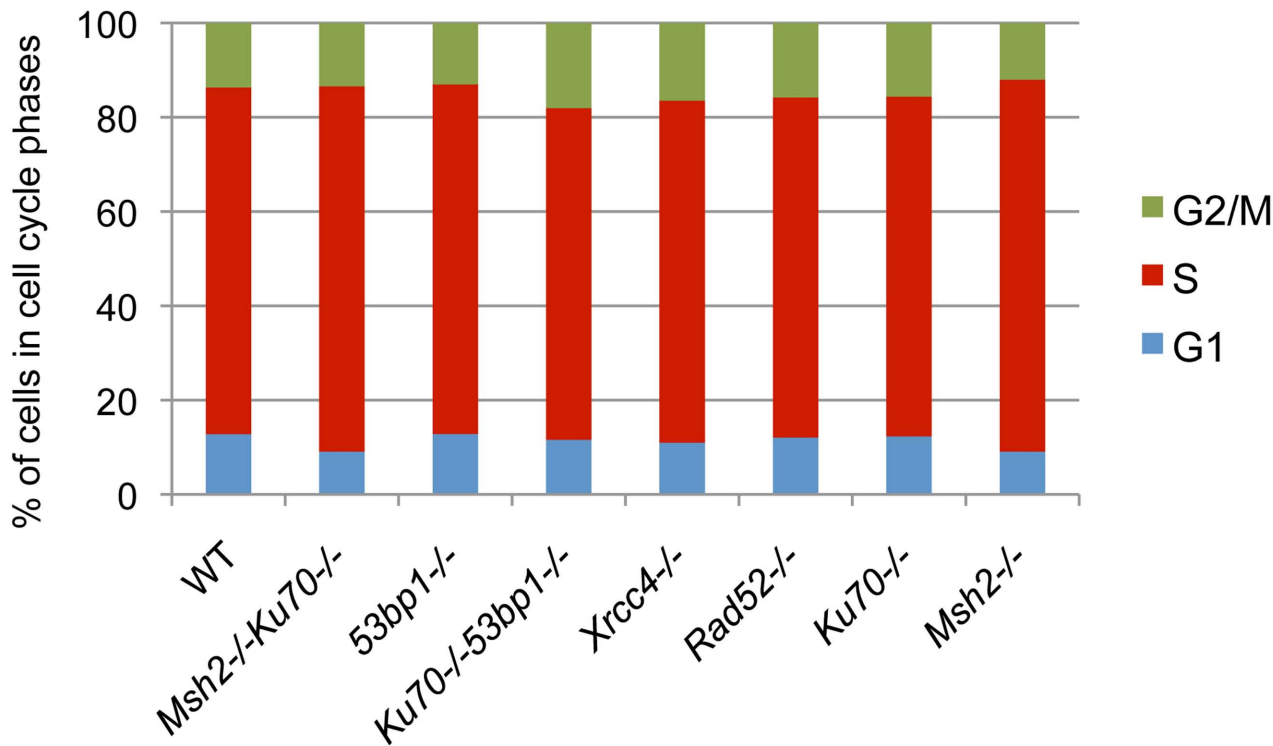

**Figure S9.** Shown are cell cycle profiles of the mESC lines used in this study. Cells were treated for 30 min. with BrdU, followed by fixation and staining for BrdU and propidium iodide. Cell cycle phases (G1, S, and G2/M) were then quantified using flow cytometry.
