# Supplementary material for: Repeat-mediated deletions can be induced by a chromosomal break far from a repeat, but multiple pathways suppress such rearrangements
Source: PubMed Central journal article supplement — Genes Dev. 2018 Apr 1;32(7-8):524–36. doi: 10.1101/gad.311084.117 (PMC5959236; doi:10.1101/gad.311084.117), 2018-04-01
Supplement: supp_gad.311084.117_Supplemental_Table_S1.pdf [file supp_gad.311084.117_Supplemental_Table_S1.pdf]

**Table S1 GENESDEV/2017/311084\_Mendez-Dorantes**

**Table S1: Shown are sgRNA sequences, and surveyor primers used in this study**

| <b>Target</b>     | <b>sgRNA in px330</b>   | <b>Surveyor P1</b>     | <b>Surveyor P2</b>     |
|-------------------|-------------------------|------------------------|------------------------|
| <i>hyg</i> gene   | 5'gcggcgcagctatttaccgc  |                        |                        |
| <i>Ku70</i> gene  | 5'gccatgggggtcgtcttcat  |                        |                        |
| <i>53bp1</i> gene | 5'gtgcaagacatggccatgagg |                        |                        |
| 5'268             | 5'gccataggcgtgggacctcgt | 5'gcctgacaggtaaggacagg | 5'gagaggtagatccccaac   |
| 16 bp             | 5'gatcagaagcttagggataac | 5'gcctgaagaacgagatcagc | 5'ccggtaggcagaggaagta  |
| 3.3 kbp           | 5'gcccgcaccgacacctgg    | 5'ccaccgcagctctgagtc   | 5'cagagtagaccgagccgaag |
| 9.1 kbp           | 5'gatgtttggattglatggcca | 5'cttgccaccttcttgaacc  | 5'aaacaggaaggtgaggatgg |
| 19 kbp            | 5'gtcctgcatagccttgatg   | 5'cagcgaacaggtcggttaat | 5'atcacttgctcaagcacag  |
| 28.4 kbp          | 5'ggaagctaacgacactaacg  | 5'ggctcccctgtcctgatatt | 5'cacaactgcgagagcacttc |
